# Supplementary material for: The acute effect of fasted exercise on energy intake, energy expenditure, subjective hunger and gastrointestinal hormone release compared to fed exercise in healthy individuals: a systematic review and network meta-analysis
Source: PubMed Central journal article supplement (PMC8794783; doi:10.1038/s41366-021-00993-1), 2021-11-03

**A)**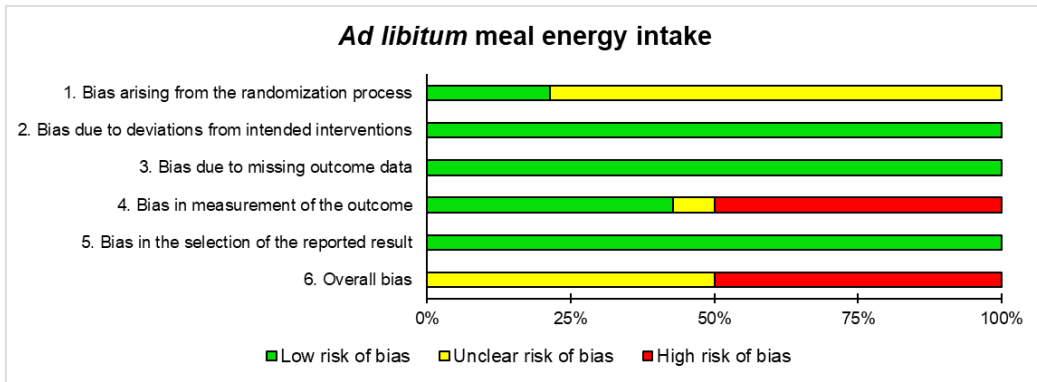**B)**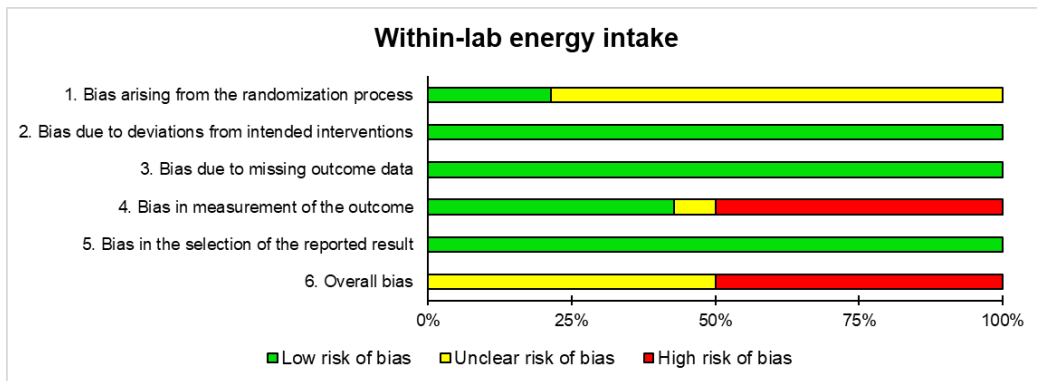**C)**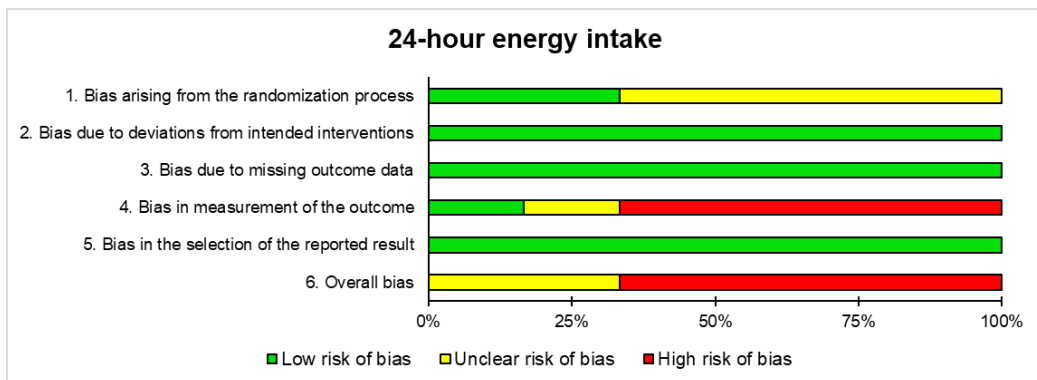**D)**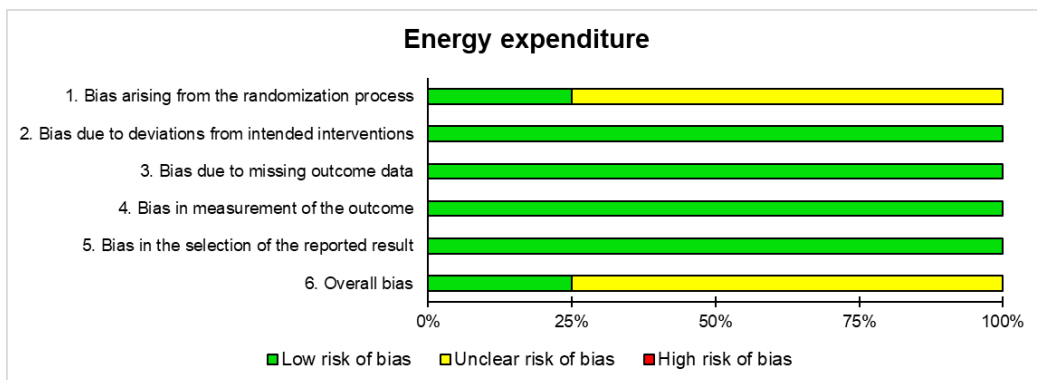**E)**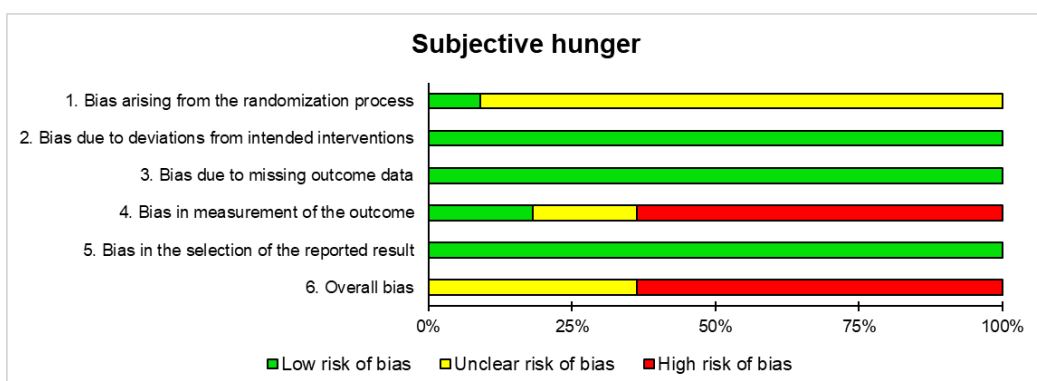

Supplement: 41366_2021_993_MOESM8_ESM.pdf [file 41366_2021_993_MOESM8_ESM.pdf]
