# Supplementary material for: The acute effect of fasted exercise on energy intake, energy expenditure, subjective hunger and gastrointestinal hormone release compared to fed exercise in healthy individuals: a systematic review and network meta-analysis
Source: PubMed Central journal article supplement (PMC8794783; doi:10.1038/s41366-021-00993-1), 2021-11-03

- FastEx+Meal vs FedEx+NoMeal
- FastEx+Meal vs FedEx+Meal
- FastEx+NoMeal vs FedEx+NoMeal
- FedEx+Meal vs FedEx+NoMeal

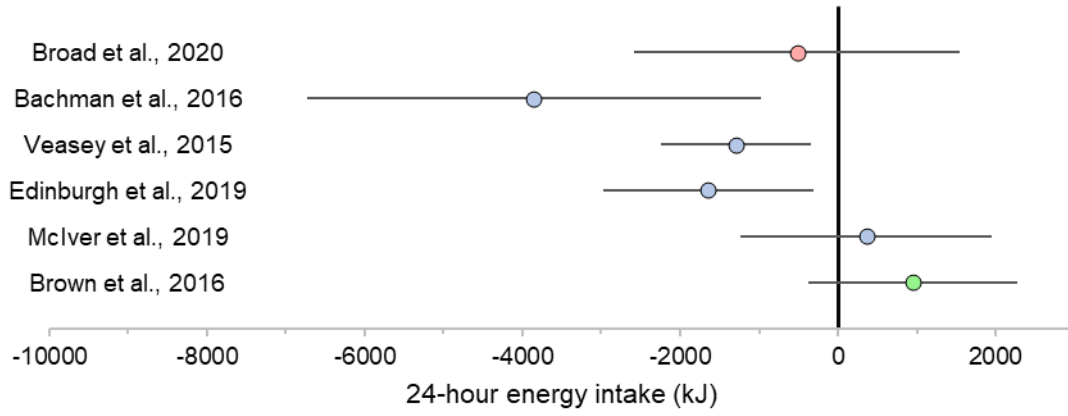

Supplement: 41366_2021_993_MOESM14_ESM.pdf [file 41366_2021_993_MOESM14_ESM.pdf]
