# Supplementary material for: The acute effect of fasted exercise on energy intake, energy expenditure, subjective hunger and gastrointestinal hormone release compared to fed exercise in healthy individuals: a systematic review and network meta-analysis
Source: PubMed Central journal article supplement (PMC8794783; doi:10.1038/s41366-021-00993-1), 2021-11-03

- FastEx+Meal vs FedEx+NoMeal
  - FastEx+NoMeal vs FedEx+NoMeal
- FastEx+Meal vs FedEx+Meal
  - FastEx+NoMeal vs FastEx+Meal

Bennard & Doucet, 2006a

Bennard & Doucet, 2006b

Broad et al., 2020

Davis et al., 1989b

Farah & Gill, 2013

Davis et al., 1989a

Edinburgh et al., 2019

Davis et al., 1989c

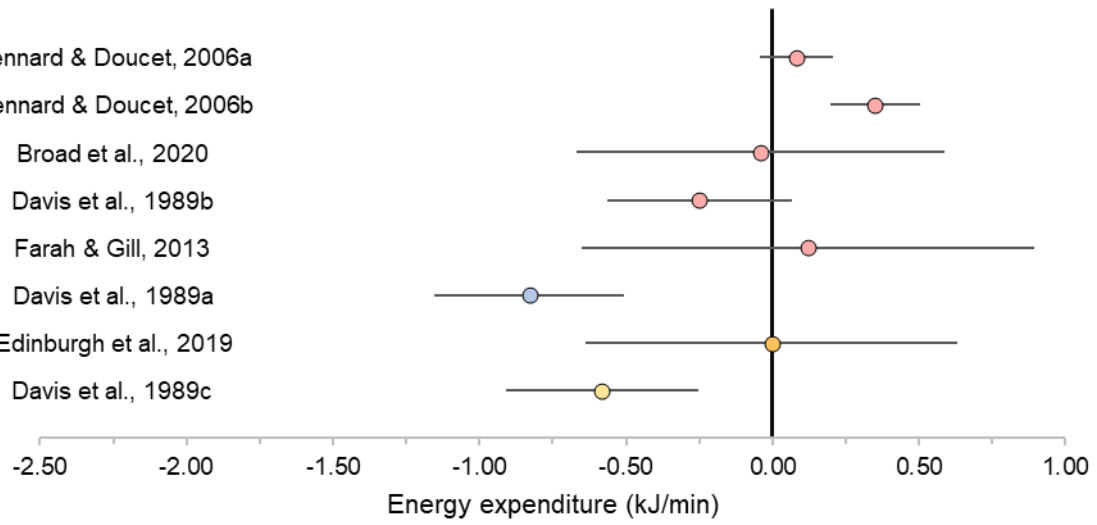

Supplement: 41366_2021_993_MOESM15_ESM.pdf [file 41366_2021_993_MOESM15_ESM.pdf]
